# Supplementary material
Source: ML conference proceedings conference paper supplement (https://aclanthology.org/2026.semeval-1.173)
Supplement: SupplementaryMaterial [file architecture.pdf › architecture.pdf]

# Multi-Turn RAG System Architecture

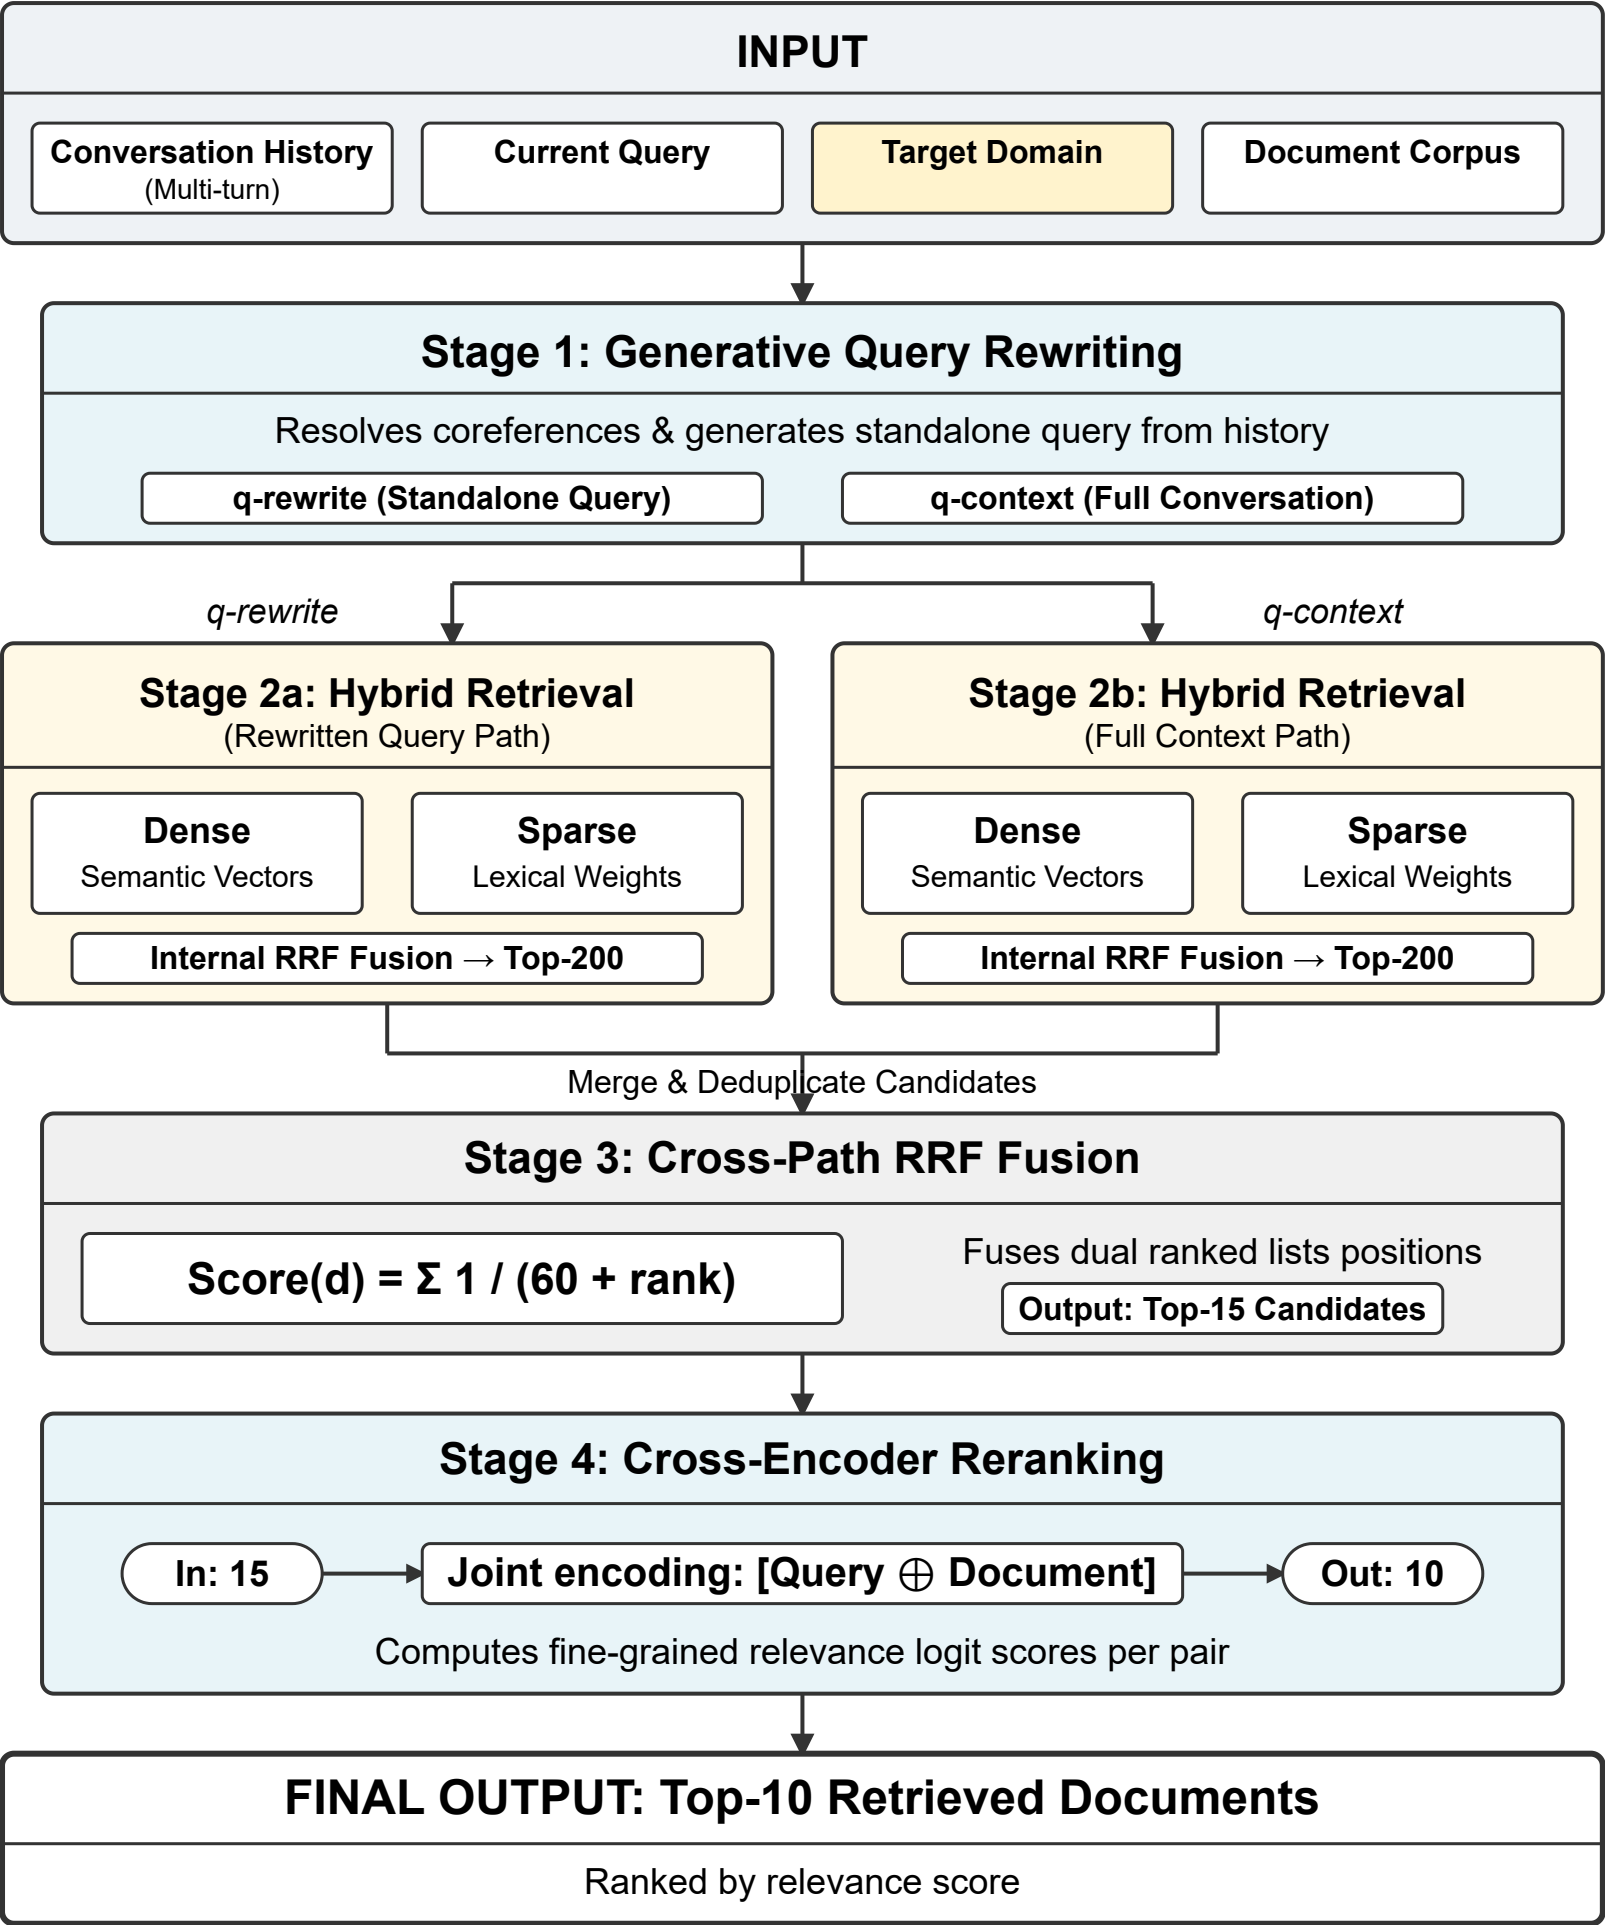

## Models Used:

- Query Rewriter:** Qwen2.5-1.5B-Instruct (LLM, 1.5B params) — coreference resolution
- Embedding:** BAAI/bge-m3 (Bi-Encoder) — multi-functional dense+sparse vectors
- Reranker:** BAAI/bge-reranker-v2-m3 (Cross-Encoder) — joint attention scoring
