# Supplementary material
Source: ML conference proceedings conference paper supplement (https://aclanthology.org/2026.semeval-1.173)

# Multi-Turn RAG System Architecture

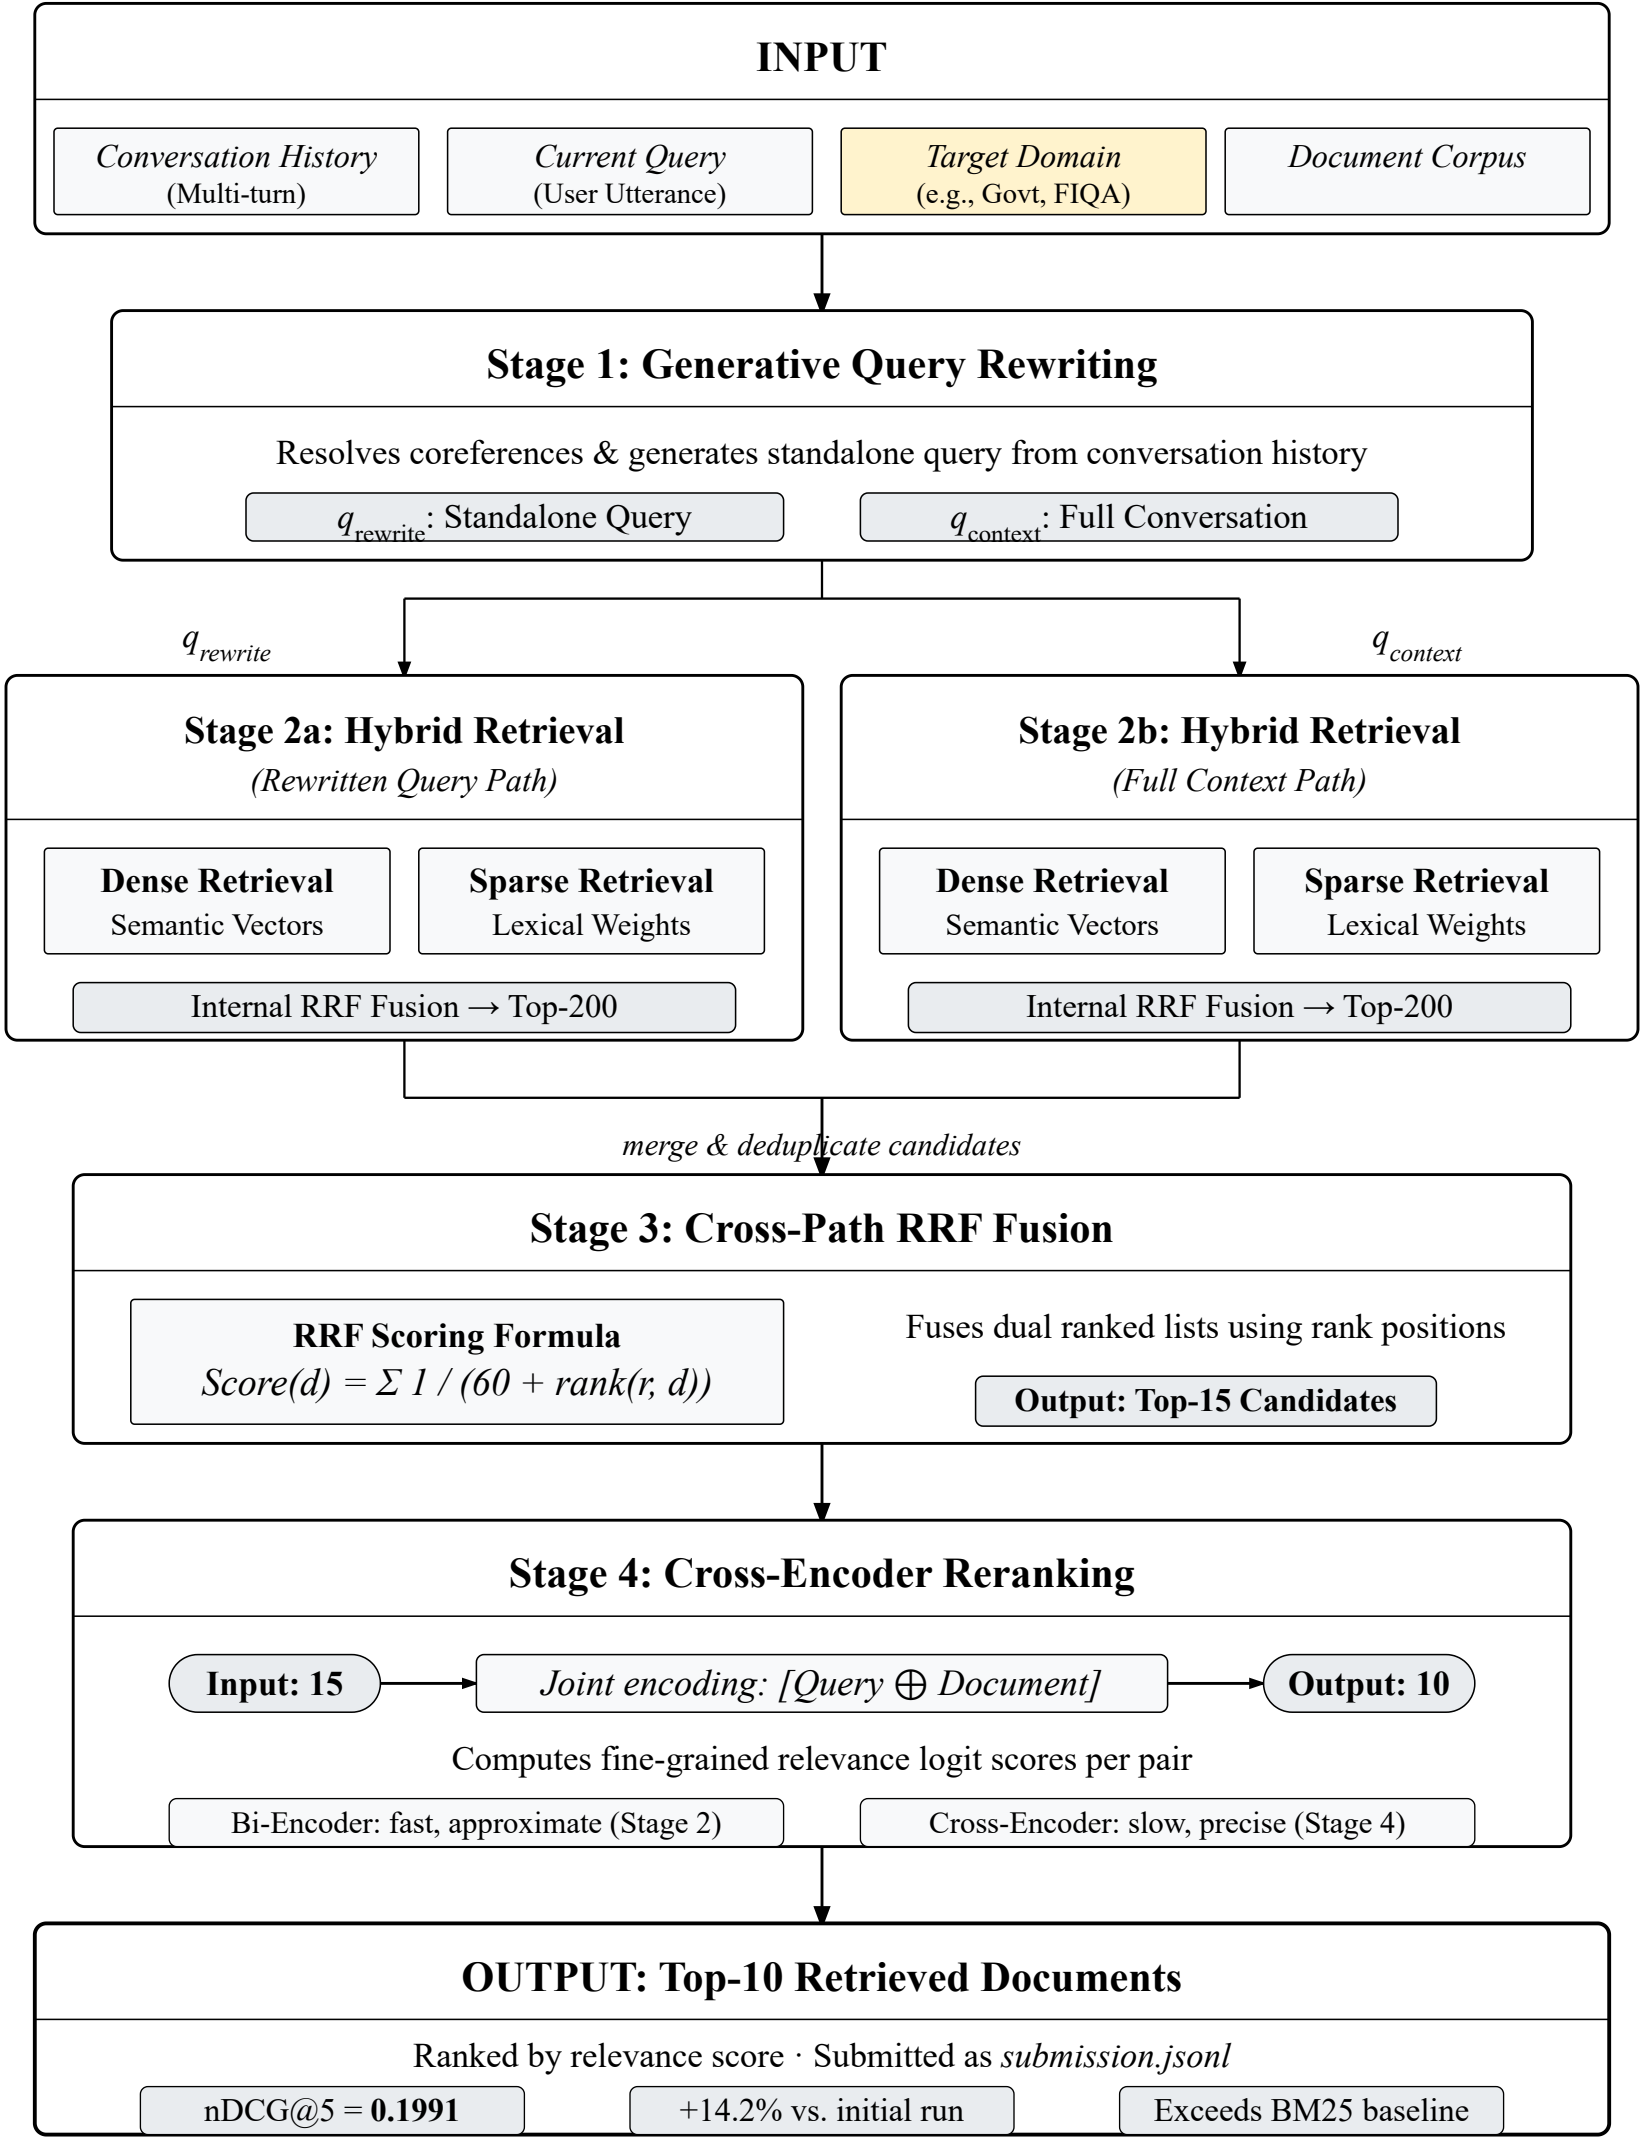

Supplement: SupplementaryMaterial [file architecture.pdf › latex/architecture.pdf]
